# Supplementary material
Source: PubMed Central journal article supplement (PMC6694223)

**Fig 3B**

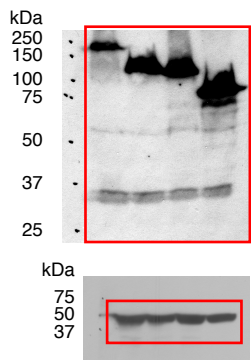

**Fig 3D**

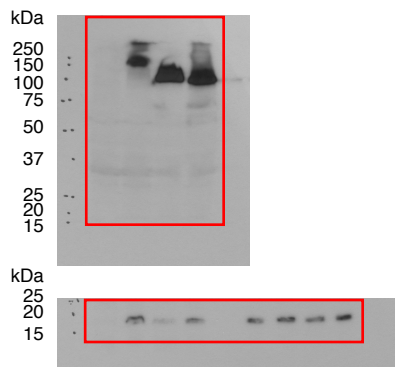

**Fig 3E**

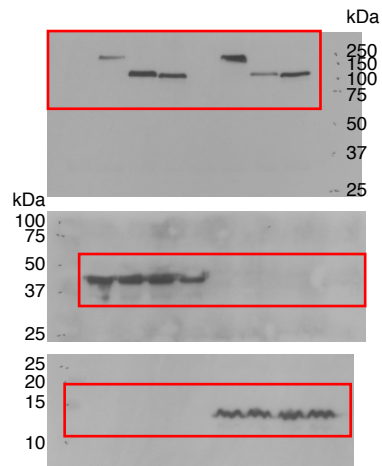

Supplement: EMBJ-38-e102003-s007.pdf [file EMBJ-38-e102003-s007.pdf]

**Fig 4A**

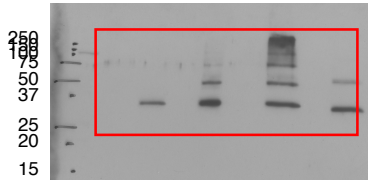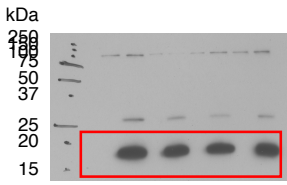

Supplement: EMBJ-38-e102003-s008.pdf [file EMBJ-38-e102003-s008.pdf]

**Fig 5A**

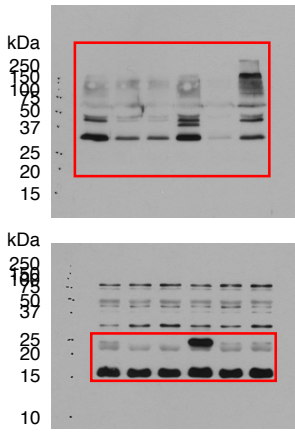

**Fig 5B**

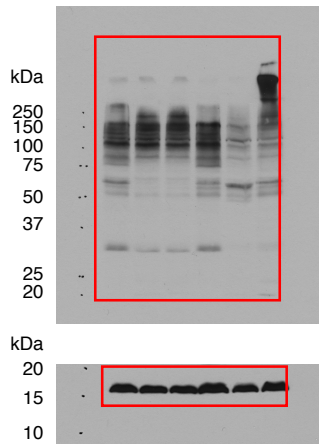

**Fig 5F**

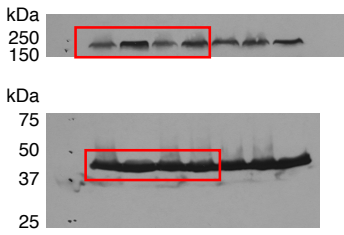

Supplement: EMBJ-38-e102003-s009.pdf [file EMBJ-38-e102003-s009.pdf]

**Fig 6F**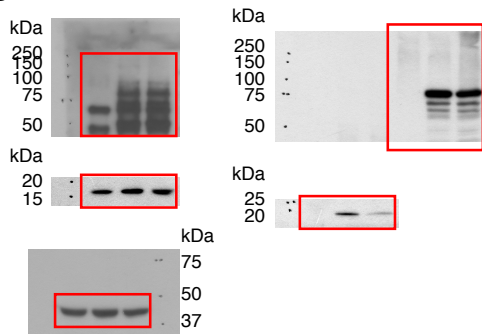**Fig 6L**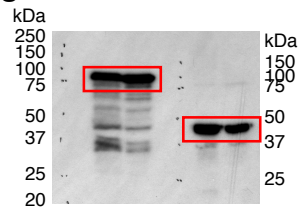

Supplement: EMBJ-38-e102003-s010.pdf [file EMBJ-38-e102003-s010.pdf]
